# Supplementary material for: Green Epoxidation of Olefins with ZnxAl/MgxAl-LDH Compounds: Influence of the Chemical Composition
Source: MDPI journal article supplement (doi:10.3390/catal12020145), 2022-01-24
Supplement: s1 [file s1]

*Supplementary Material*

# Green epoxidation of olefins with $\text{Zn}_x\text{Al}/\text{Mg}_x\text{Al}$ -LDH compounds: influence of the chemical composition

Rodica Zăvoianu <sup>1,2</sup>, Anca Cruceanu <sup>1,2</sup>, Octavian Dumitru Pavel <sup>1,2,\*</sup>, Corina Bradu <sup>3,4</sup>, Mihaela Florea <sup>3</sup> and Ruxandra Bîrjega <sup>4</sup>

<sup>1</sup> University of Bucharest, Faculty of Chemistry, 4-12 Regina Elisabeta Blv., 030018 Bucharest, Romania; rodica.zavoianu@chimie.unibuc.ro (R.Z.); anca.cruceanu@chimie.unibuc.ro (A.C.)

<sup>2</sup> Research Center for Catalysts & Catalytic Processes, Faculty of Chemistry, University of Bucharest, 4-12 Regina Elisabeta Blv., 030018 Bucharest, Romania

<sup>3</sup> Faculty of Biology, University of Bucharest, 91-95 Splaiul Independenței, 050095 Bucharest, Romania; corina.bradu@g.unibuc.ro (C.B.)

<sup>4</sup> Research Center for Environmental Protection and Waste Management (PROTMED), Research Platform in Biology and Systems Ecology, Faculty of Biology, University of Bucharest, 91-95 Splaiul Independenței, 050095 Bucharest, Romania

<sup>5</sup> National Institute of Materials Physics, 405A Atomistilor Street, 077125 Magurele, Romania; mihaela.florea@infim.ro (M.F.)

<sup>6</sup> INFLPR, National Institute for Lasers, Plasma and Radiation Physics, 077125 Măgurele, Romania; ruxandra.birjega@inflpr.ro (R.B.)

\* Correspondence: octavian.pavel@chimie.unibuc.ro (O.D.P.); Tel.: +4 021 305 14 64

**Table S1.** Structural parameters of freshly prepared samples.

| HT Samples                         | <i>a</i> (Å) | <i>c</i> (Å) | <i>D</i> <sub>003</sub> (nm)<br>* | <i>D</i> <sub>110</sub> (nm)<br>* | <i>I</i> <sub>003</sub> / <i>I</i> <sub>110</sub> | Impurities                                                        |
|------------------------------------|--------------|--------------|-----------------------------------|-----------------------------------|---------------------------------------------------|-------------------------------------------------------------------|
| Zn <sub>2</sub> Al                 | 3.055        | 22.156       | 25.1                              | 35.6                              | 7.1                                               |                                                                   |
| Zn <sub>2.5</sub> Al               | 3.059        | 22.295       | 19.0                              | 26.9                              | 7.7                                               | small amorphous peak                                              |
| Zn <sub>3</sub> Al                 | 3.066        | 22.476       | 21.8                              | 30.2                              | 7.1                                               |                                                                   |
| Zn <sub>4</sub> Al                 | 3.066        | 22.486       | 23.3                              | 32.0                              | 8.6                                               | Zn <sub>3</sub> (OH) <sub>4</sub> (NO <sub>3</sub> ) <sub>2</sub> |
| Zn <sub>5</sub> Al                 | 3.068        | 22.547       | 21.8                              | 29.2                              | 6.0                                               | Zn <sub>3</sub> (OH) <sub>4</sub> (NO <sub>3</sub> ) <sub>2</sub> |
| Zn <sub>2</sub> Al                 | 3.055        | 22.270       | 23.4                              | 22.8                              | 7.6                                               | amorphous peak                                                    |
| Zn <sub>2.5</sub> Al               | 3.062        | 22.377       | 18.3                              | 28.8                              | 6.3                                               | small amorphous peak                                              |
| Zn <sub>3</sub> Al                 | 3.065        | 22.420       | 17.7                              | 31.4                              | 6.2                                               | Zn <sub>3</sub> (OH) <sub>4</sub> (NO <sub>3</sub> ) <sub>2</sub> |
| Zn <sub>4</sub> Al                 | 3.070        | 22.624       | 16.2                              | 27.3                              | 5.9                                               | Zn <sub>3</sub> (OH) <sub>4</sub> (NO <sub>3</sub> ) <sub>2</sub> |
| Zn <sub>5</sub> Al                 | 3.067        | 22.507       | 23.1                              | 31.0                              | 7.8                                               | Zn <sub>3</sub> (OH) <sub>4</sub> (NO <sub>3</sub> ) <sub>2</sub> |
| Zn <sub>3</sub> MgAl               | 3.065        | 22.656       | 12.3                              | 20.3                              | 4.8                                               |                                                                   |
| Zn <sub>2</sub> Mg <sub>2</sub> Al | 3.065        | 22.680       | 5.5                               | 10.7                              | 3.4                                               | amorphous                                                         |
| ZnMg <sub>3</sub> Al               | 3.064        | 22.629       | 5.0                               | 9.7                               | 2.9                                               |                                                                   |
| Mg <sub>2</sub> Al                 | 3.049        | 23.063       | 9.2                               | 22.1                              | 4.0                                               |                                                                   |
| Mg <sub>2.5</sub> Al               | 3.054        | 23.307       | 8.1                               | 12.9                              | 4.9                                               |                                                                   |
| Mg <sub>3</sub> Al                 | 3.066        | 23.592       | 8.2                               | 24.2                              | 3.7                                               |                                                                   |
| Mg <sub>4</sub> Al                 | 3.061        | 23.272       | 7.6                               | 13.4                              | 3.7                                               |                                                                   |
| Mg <sub>5</sub> Al                 | 3.060        | 24.064       | 4.2                               | 6.9                               | 2.7                                               |                                                                   |

\* Crystallite dimensions (with Debye-Scherrer equation) and obtained from FWHM of 003 and 110 reflections for HT and RHT samples

Table S2. Structural parameters of calcined samples.

| CHT Samples                            | ZnO-zincite Type Phase [Zn(Al)O] |              |                       |                       | MgO-Periclase Type Phase [Mg(Al)O] |                       |
|----------------------------------------|----------------------------------|--------------|-----------------------|-----------------------|------------------------------------|-----------------------|
|                                        | <i>a</i> (Å)                     | <i>c</i> (Å) | Vol (Å <sup>3</sup> ) | D <sub>101</sub> (nm) | <i>a</i> (Å)                       | D <sub>200</sub> (nm) |
| Standard ZnO ICDD-36-1451              | 3.250                            | 5.207        | 47.62                 | -                     | -                                  | -                     |
| CHT-Zn <sub>5</sub> Al                 | 3.240                            | 5.193        | 47.20                 | 17.0                  | -                                  | -                     |
| CHT-Zn <sub>4</sub> Al                 | 3.240                            | 5.198        | 47.25                 | 12.2                  | -                                  | -                     |
| CHT-Zn <sub>3</sub> Al                 | 3.238                            | 5.200        | 47.21                 | 7.3                   | -                                  | -                     |
| CHT-Zn <sub>2.5</sub> Al               | 3.250                            | 5.200        | 47.48                 | 4.1                   | -                                  | -                     |
| CHT-Zn <sub>2</sub> Al                 | 3.24                             | 5.198        | 47.25                 | 3.8                   | -                                  | -                     |
| CHT-Zn <sub>3</sub> MgAl               | 3.244                            | 5.191        | 47.31                 | 5.8                   | -                                  | -                     |
| CHT-Zn <sub>2</sub> Mg <sub>2</sub> Al | 3.240                            | 5.190        | 47.24                 | 3.7                   | 4.182                              | 2.3                   |
| CHT-ZnMg <sub>3</sub> Al               | 3.240                            | 5.170        | 46.85                 | 2.7                   | 4.194                              | 2.7                   |
| Standard MgO ICDD 45-0946              | -                                | -            | -                     | -                     | 4.211                              | -                     |
| CHT Mg <sub>5</sub> Al                 | -                                | -            | -                     | -                     | 4.187                              | 4.0                   |
| CHT Mg <sub>4</sub> Al                 | -                                | -            | -                     | -                     | 4.176                              | 3.4                   |
| CHT Mg <sub>3</sub> Al                 | -                                | -            | -                     | -                     | 4.142                              | 3.1                   |
| CHT Mg <sub>2.5</sub> Al               | -                                | -            | -                     | -                     | 4.133                              | 6.0                   |
| CHT Mg <sub>2</sub> Al                 | -                                | -            | -                     | -                     | 4.127                              | 8.0                   |

\* Crystallite dimensions (with Debye-Scherrer equation) obtained from FWHM of 200 reflection for Mg(Al)O and 101 reflection for Zn(Al)O

Table S3. Structural parameters of reconstructed samples.

| RHT Samples                            | HT phase     |              |                       |                       |                                    | Oxide Phase Zn(Al)O |              |                       |                       |
|----------------------------------------|--------------|--------------|-----------------------|-----------------------|------------------------------------|---------------------|--------------|-----------------------|-----------------------|
|                                        | <i>a</i> (Å) | <i>c</i> (Å) | D <sub>003</sub> (nm) | D <sub>110</sub> (nm) | I <sub>003</sub> /I <sub>110</sub> | <i>a</i> (Å)        | <i>c</i> (Å) | Vol (Å <sup>3</sup> ) | D <sub>101</sub> (nm) |
| RHT-Zn <sub>2</sub> Al                 | 3.057        | 22.360       | 17.9                  | 22.7                  | 6.9                                | 3.255               | 5.080        | 46.64                 | 7.6                   |
| RHT-Zn <sub>2.5</sub> Al               | 3.065        | 22.338       | 17.9                  | 24.3                  | 5.3                                | 3.252               | 5.280        | 48.37                 | 17.2                  |
| RHT-Zn <sub>3</sub> Al                 | 3.051        | 22.546       | 8.8                   | 16.5                  | 4.7                                | 3.269               | 5.240        | 47.62                 | 15.9                  |
| RH-Zn <sub>4</sub> Al                  | 3.062        | 22.504       | 16.5                  | 26.9                  | 5.1                                | 3.246               | 5.195        | 47.40                 | 20.2                  |
| RHT-Zn <sub>5</sub> Al                 | 3.059        | 22.375       | 19.4                  | 34.6                  | 4.6                                | 3.241               | 5.198        | 47.29                 | 24.4                  |
| RHT-Zn <sub>3</sub> MgAl               | 3.052        | 22.547       | 21.4                  | 18.8                  | 6.4                                | 3.250               | 5.220        | 47.72                 | 14.3                  |
| RHT-Zn <sub>2</sub> Mg <sub>2</sub> Al | 3.044        | 22.637       | 9.0                   | 14.0                  | 4.3                                | 3.245               | 5.191        | 47.34                 | 18.1                  |
| RHT-ZnMg <sub>3</sub> Al               | 3.060        | 23.051       | 10.1                  | 17.4                  | 3.1                                | 3.246               | 5.197        | 47.43                 | 15.7                  |
| RHT-Mg <sub>4</sub> Al                 | 3.073        | 23.164       | 8.2                   | 9.6                   | 3.5                                | -                   | -            | -                     | -                     |
| RHT-Mg <sub>2</sub> Al                 | 3.058        | 23.288       | 9.9                   | 11.6                  | 6.7                                | -                   | -            | -                     | -                     |
| RHT-Mg <sub>2.5</sub> Al               | 3.062        | 23.318       | 11.5                  | 18.0                  | 7.2                                | -                   | -            | -                     | -                     |
| RHT-Mg <sub>3</sub> Al                 | 3.063        | 23.363       | 12.7                  | 21.1                  | 6.8                                | -                   | -            | -                     | -                     |
| RH-Mg <sub>4</sub> Al                  | 3.073        | 23.164       | 8.2                   | 9.6                   | 3.5                                | -                   | -            | -                     | -                     |
| RHT-Mg <sub>5</sub> Al                 | 3.074        | 23.773       | 6.3                   | 13.8                  | 3.7                                | -                   | -            | -                     | -                     |

\* Crystallite dimensions (with Debye-Scherrer equation) and obtained from FWHM of 003 and 110 reflections for HT and RHT samples and 101 reflection for Zn(Al)O
